# Supplementary material
Source: Springer Nature journal article supplement (https://www.springermedizin.de/resource/supplementary/12936_2012_2133_MOESM1_ESM.pdf/9542644)
Supplement: MOESM1 [file 9542644]

# Continuous Schiphol Survey

**Vaccination (Q-vacc)  
questionnaires**

(2002) n=255

(2003) n=196

(2004) n=311

(2005) n=485

(2007) n=319

(2008) n=327

(2009) n=325

**Malaria (Q-mal)  
questionnaires**

n=131 (2002)

n=88 (2003)

n=146 (2004)

n=185 (2005)

n=92 (2007)

n=107 (2008)

n=101 (2009)

**3050 respondents**

**5 excluded because of entering  
non-valid country code**

**3045 respondents included in malaria risk study**

**High-risk destination  
N=708**

**Low-risk destination  
N=2337**
